# Supplementary material for: Introduction of carbon nanodots into SnO2 electron transport layer for efficient and UV stable planar perovskite solar cells
Source: Royal Society of Chemistry journal article supplement (doi:10.1039/c8ta11651b), 2019-01-01
Supplement: c8ta11651b1.pdf [file c8ta11651b1.pdf]

## Introduction of carbon nanodots into SnO<sub>2</sub> electron transport layer for efficient and UV stable planar perovskite solar cells

Shuo Wang<sup>a</sup>, Yu Zhu<sup>a</sup>, Bao Liu<sup>a</sup>, Chengyan Wang<sup>a,b\*</sup>, Ruixin Ma<sup>a,c\*</sup>

<sup>a</sup> School of Metallurgy and Ecological Engineering, University of Science and  
Technology Beijing, Beijing 100083, PR China

<sup>b</sup> Beijing Key Laboratory of Rare and Precious Metals Green Recycling and  
Extraction, University of Science and Technology Beijing, Beijing 100083, PR China

\*Corresponding author:

Chengyan Wang E-mail: chywang@yeah.net (C.Wang).

Ruixin Ma E-mail: maruixin@ustb.edu.cn (R.Ma)

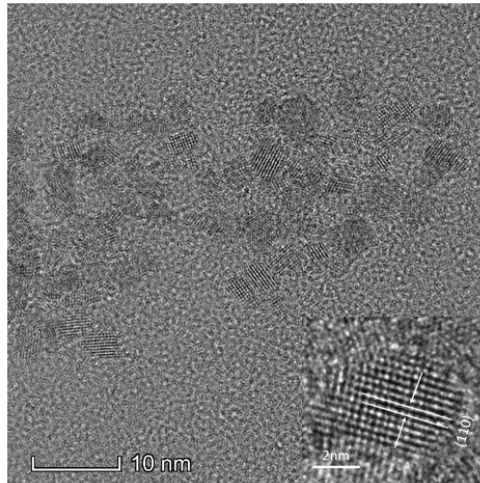

**Fig. S1** The TEM image of the SnO<sub>2</sub> particles obtained from the SnO<sub>2</sub> nanocolloid.

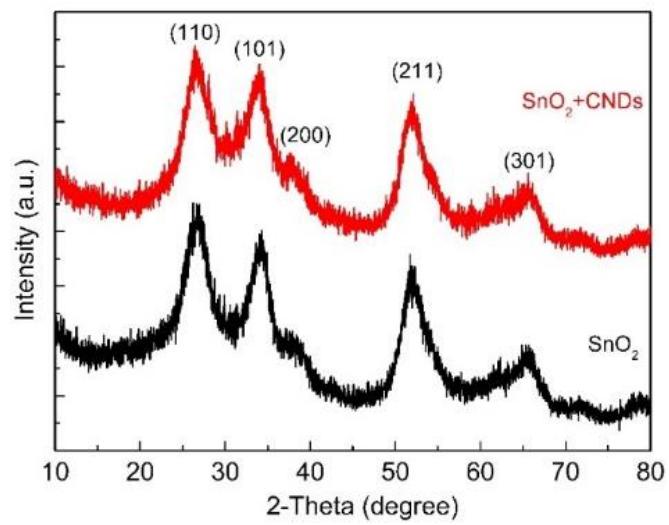

**Fig. S2** XRD patterns of SnO<sub>2</sub> and SnO<sub>2</sub>:CNDs.

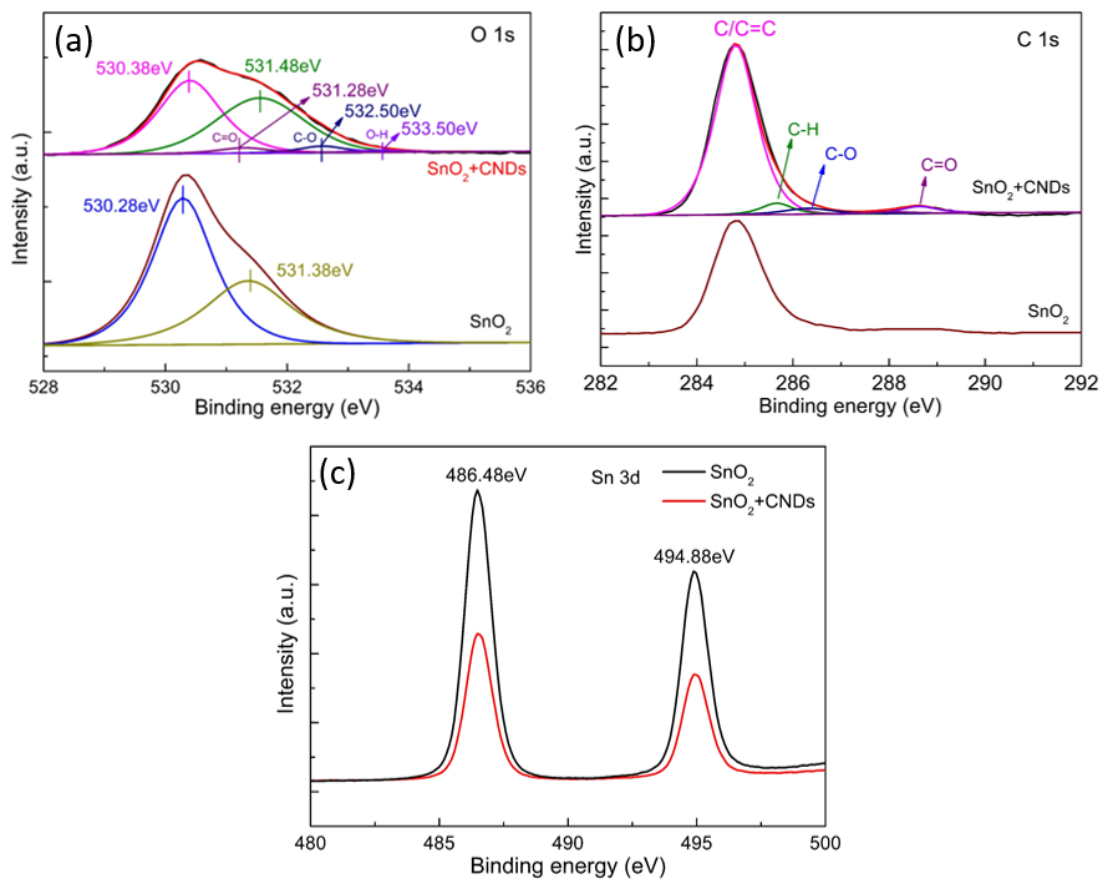

**Fig. S3** XPS spectra of (b) C 1s, (c) O 1s and (d) Sn 3d peaks of SnO<sub>2</sub> and SnO<sub>2</sub>:CNDs.

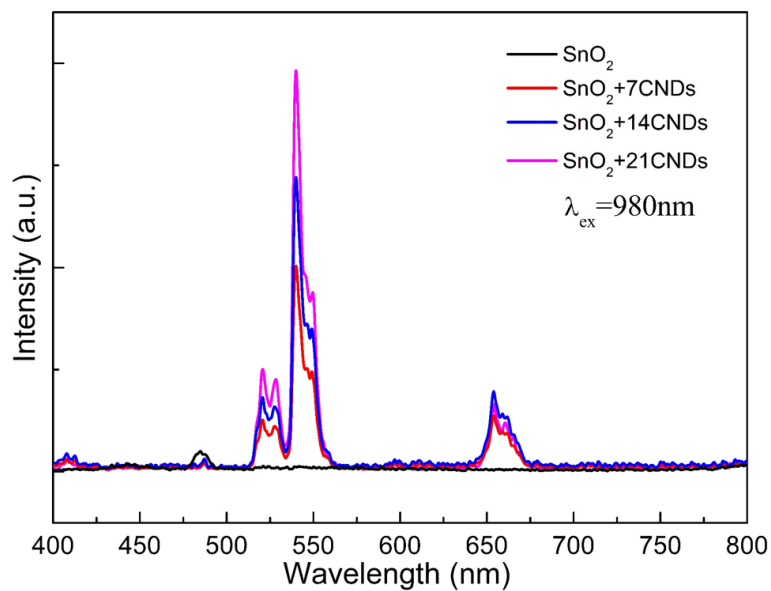

**Fig. S4** Up-conversion luminescence spectrum of SnO<sub>2</sub> and SnO<sub>2</sub>:CNDs films with various amount of CNDs deposited on quartz glass. (excitation Source: 980 nm)

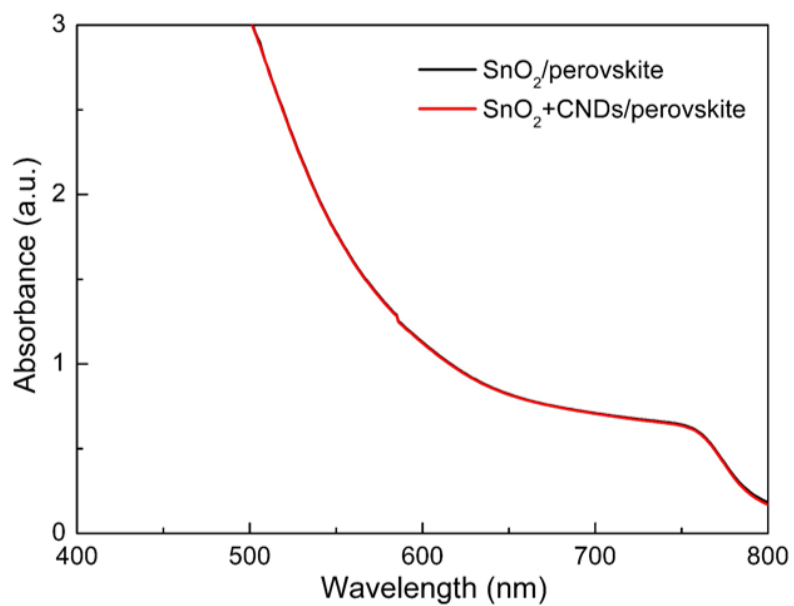

**Fig. S5** UV-vis absorption spectra of the perovskite film deposited on (a) SnO<sub>2</sub> and (b) SnO<sub>2</sub>:CNDs.

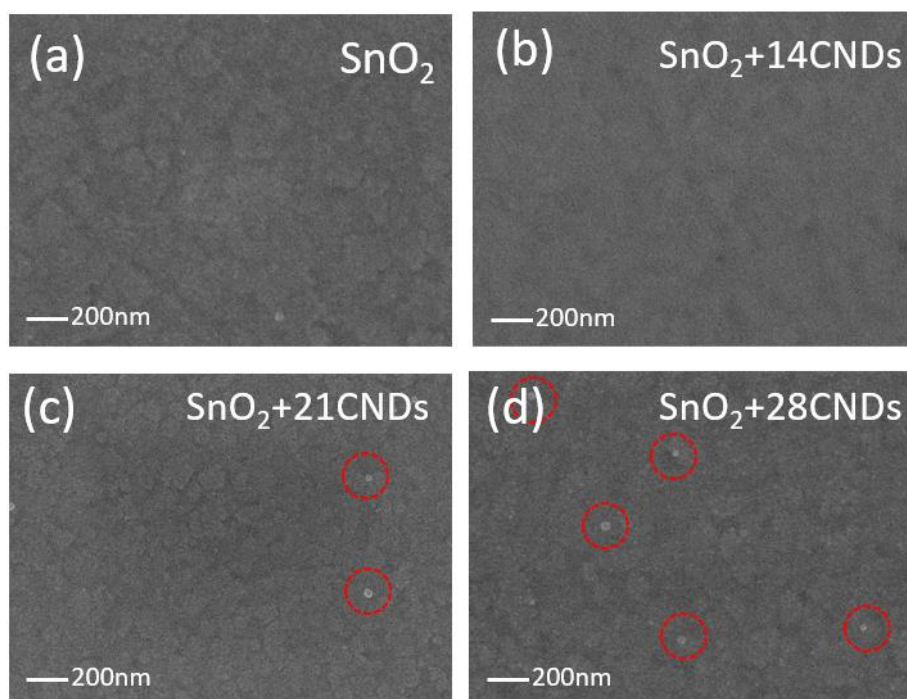

**Fig. S6** The Top-view SEM images of (a) SnO<sub>2</sub> and modified SnO<sub>2</sub> doped with different amount of CNDs. (b) 14mg, (c) 21mg and (d) 28 mg.

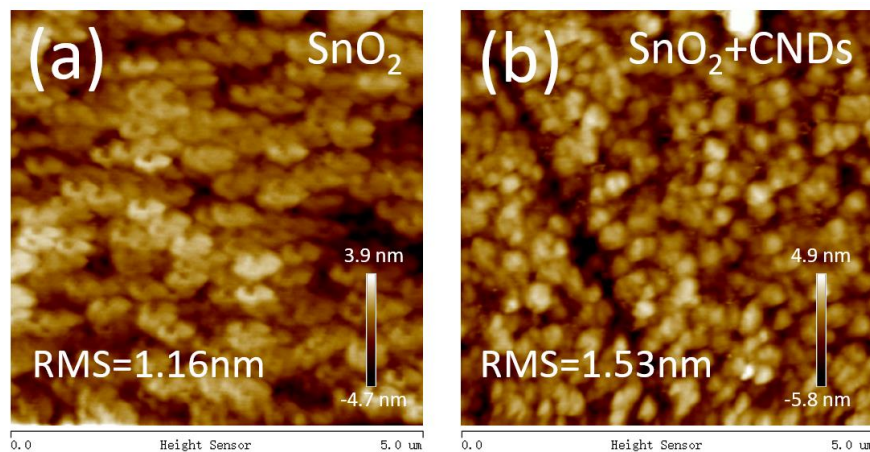

**Fig. S7** The AFM images of the SnO<sub>2</sub> and SnO<sub>2</sub>:CNDs films

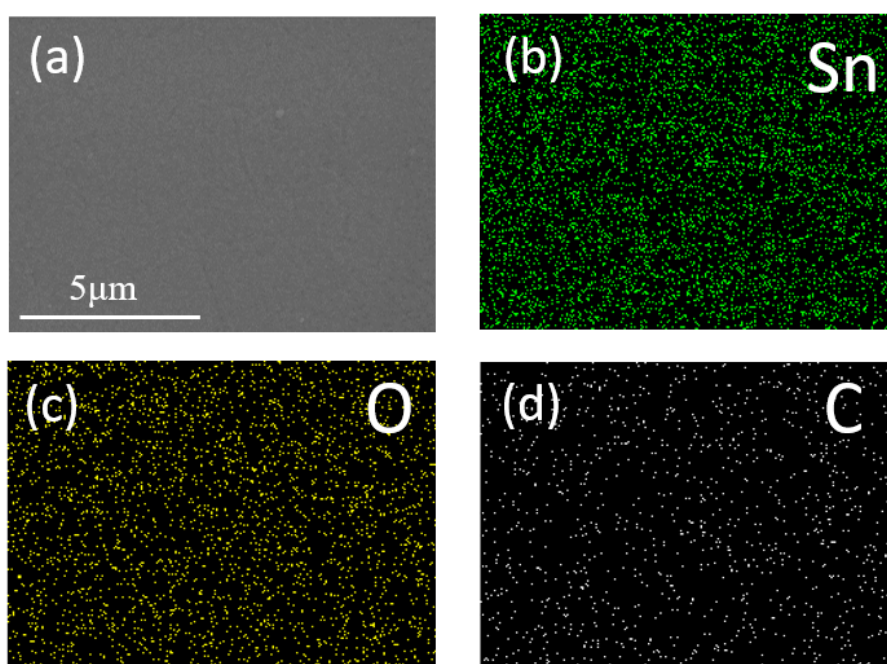

**Fig. S8** The Elemental maps of (a) SnO<sub>2</sub>:CNDs thin film. (b) Sn, (c) O and (d) C.

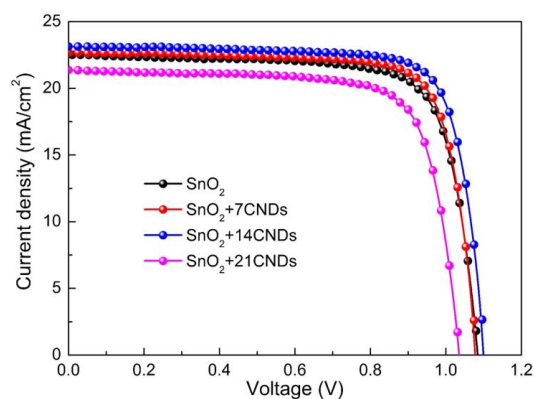

**Fig. S9** The current density-voltage curves of the device based on the SnO<sub>2</sub> ETLs with different amount of CNDs.

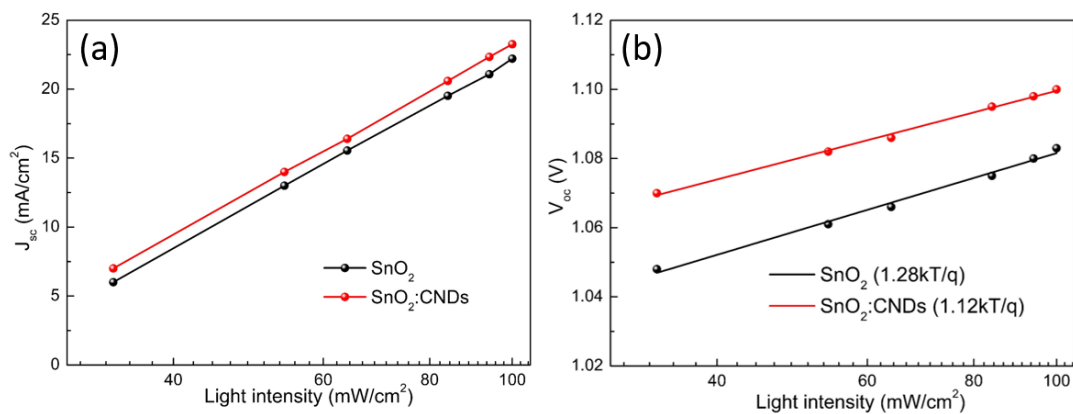

**Fig. S10** (a)  $J_{sc}$  dependence on light intensity. (b)  $V_{oc}$  dependence on light intensity.

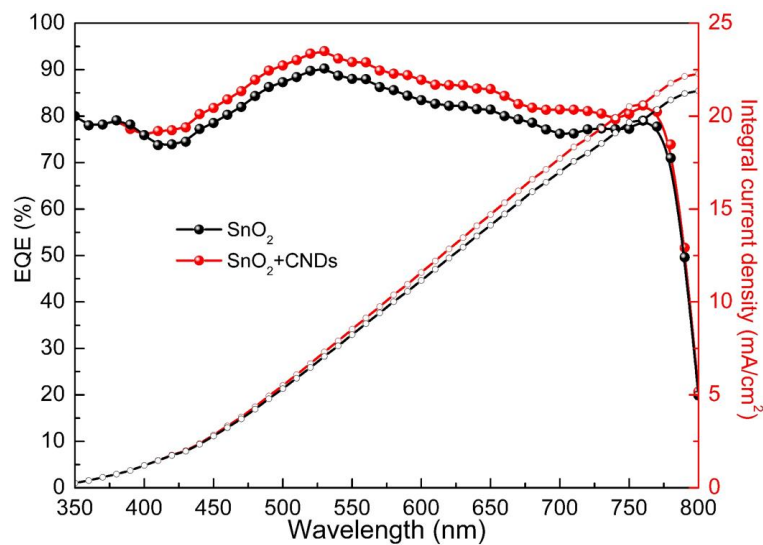

**Fig. S11** EQE spectra of the device based on SnO<sub>2</sub> and SnO<sub>2</sub>:CNDs.

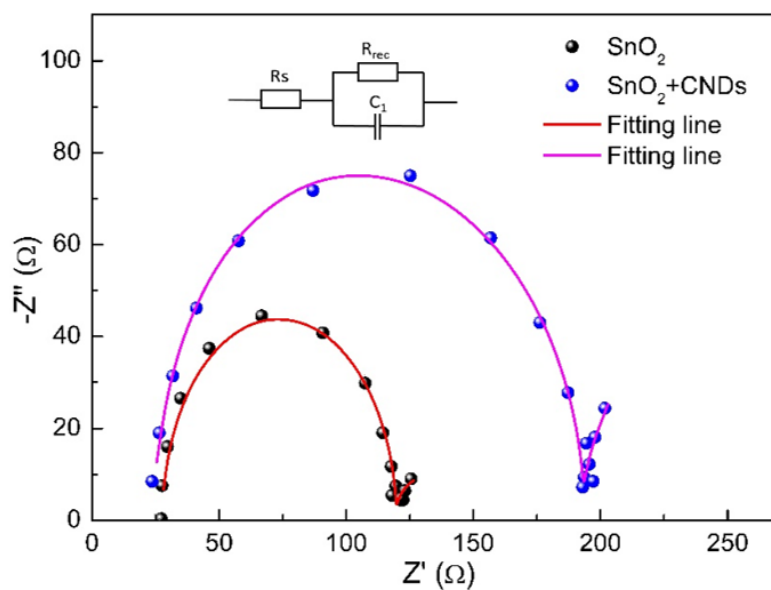

**Fig. S12** Nyquist plot of the cells based on SnO<sub>2</sub> and SnO<sub>2</sub>:CNDs measured with the frequency range from 1 MHz to 100 Hz under AM 1.5G irradiation at a direct current bias of 0 V. Symbols are experimental data and solid lines correspond to the fits using

the equivalent circuit (inset).

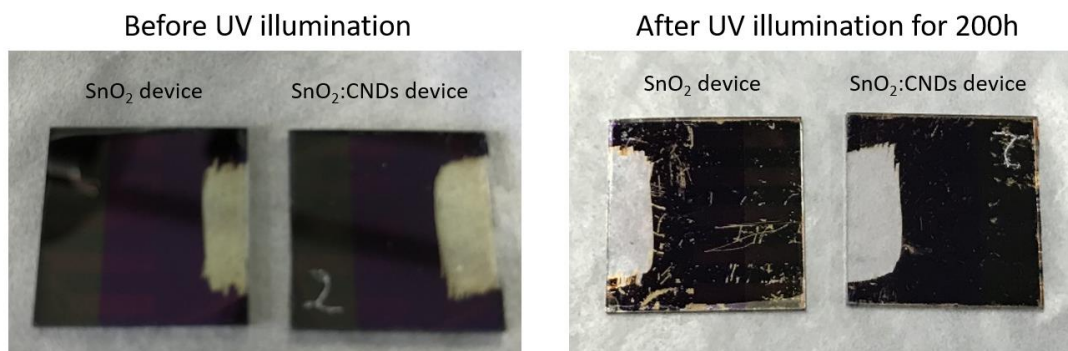

**Fig. S13** Photographs of the SnO<sub>2</sub> device and SnO<sub>2</sub>:CNDs device under UV continuous illumination for 200h.

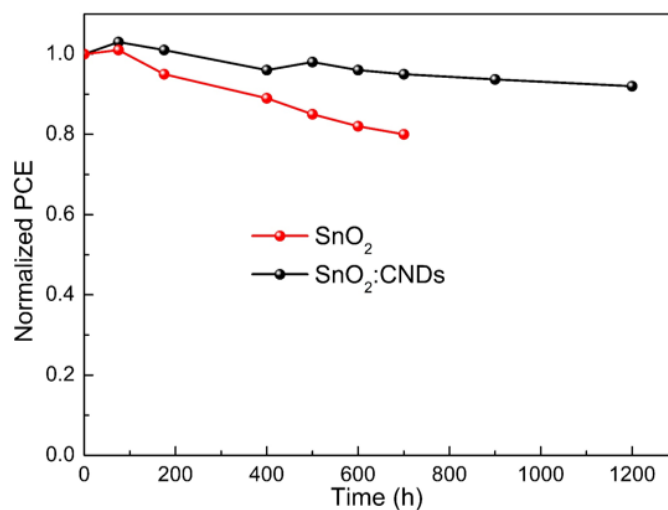

**Fig. S14** Long-term stability of the devices in dry condition for 1200 h. All the devices are measured without any encapsulation.

**Table S1** Slope of the Mott-Schottky plots and doping densities of ETLs.

| ETL                    | Slope<br>( $10^{13} \times F^{-2} V^{-1}$ ) | N<br>( $10^{18} \times cm^{-3}$ ) |
|------------------------|---------------------------------------------|-----------------------------------|
| SnO <sub>2</sub>       | 5.99                                        | 7.37                              |
| SnO <sub>2</sub> :CNDs | 5.19                                        | 8.51                              |

**Table S2** The parameters of the device based on different ETLs.

| Sample                   | J <sub>sc</sub> (mA/cm <sup>2</sup> ) | V <sub>oc</sub> (V) | FF   | PCE (%) |
|--------------------------|---------------------------------------|---------------------|------|---------|
| SnO <sub>2</sub>         | 22.51                                 | 1.08                | 0.76 | 18.54   |
| SnO <sub>2</sub> +7CNDs  | 22.67                                 | 1.07                | 0.79 | 19.17   |
| SnO <sub>2</sub> +14CNDs | 23.14                                 | 1.10                | 0.79 | 20.03   |
| SnO <sub>2</sub> +21CNDs | 21.38                                 | 1.03                | 0.76 | 16.67   |
